# Supplementary material for: Individual and simultaneous electrochemical determination of nitrofurantoin and ascorbic acid in biological samples using a novel La2YBiO6 double perovskite deposited on MWCNTs as a nanocomposite
Source: Royal Society of Chemistry journal article supplement (doi:10.1039/d3nj04573k), 2023-01-01
Supplement: d3nj04573k1.pdf [file d3nj04573k1.pdf]

## Supplementary information

### **Individual and simultaneous electrochemical determination of nitrofurantoin and ascorbic acid in biological samples using a novel $\text{La}_2\text{YBiO}_6$ double perovskite deposited on MWCNTs as a nanocomposite**

Srujan Basavapura Ravikumar <sup>1</sup>, Sanjay Ballur Prasanna <sup>2</sup>, Santhosh Arehalli Shivamurthy <sup>3,\*</sup>, Sandeep Shadakshari <sup>1,\*</sup>, Jothi Ramalingam Rajabathar <sup>5</sup>, Selvaraj Arokiyaraj <sup>6</sup>

<sup>1</sup> Department of Chemistry, SJCE, JSS Science and Technology University, Karnataka 570006, India

<sup>2</sup> Department of Chemical Engineering and Biotechnology, National Taipei University of Technology (Taipei Tech), Taipei 10608, Taiwan

<sup>3</sup> Department of Chemistry (U.G.), N.M.K.R.V. College for Women's, Karnataka 560011, India

<sup>4</sup> Centre for Nano and Material Science (CNMS), Jain University, Jain Global Campus, Bangalore, 562112, India

<sup>5</sup> Department of Chemistry, College of Science, King Saud University, P.O. Box. 2455, Riyadh, 11451, Saudi Arabia

<sup>6</sup> Department of Food Science and Biotechnology, Sejong University, Seoul-05006, South Korea.

**\* Corresponding Authors:** Dr. Santhosh Arehalli Shivamurthy and Dr. Sandeep Shadakshari

Email: [santhu41100@gmail.com](mailto:santhu41100@gmail.com); Tel: +91 8861027395

Address: Department of Chemistry (U.G.), N.M.K.R.V. College for Women's, Karnataka 560011, India

Also corresponding to Dr. Dr. Sandeep Shadakshari ([sandeep12chem@gmail.com](mailto:sandeep12chem@gmail.com)); Tel: +91

9591572962

Address: Department of Chemistry, SJCE, JSS Science and Technology University, Karnataka 570006, India

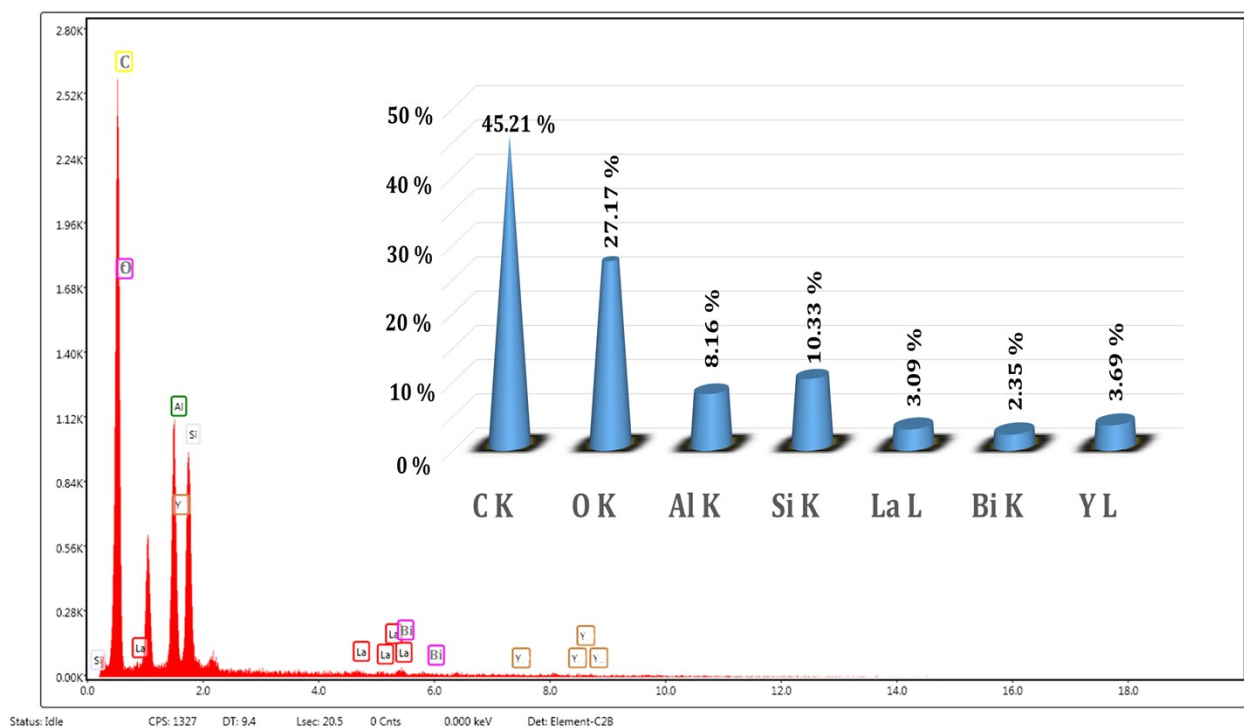

**Fig. S1.** EDS spectrum of synthesized LYB/MWCNTs nanocomposite

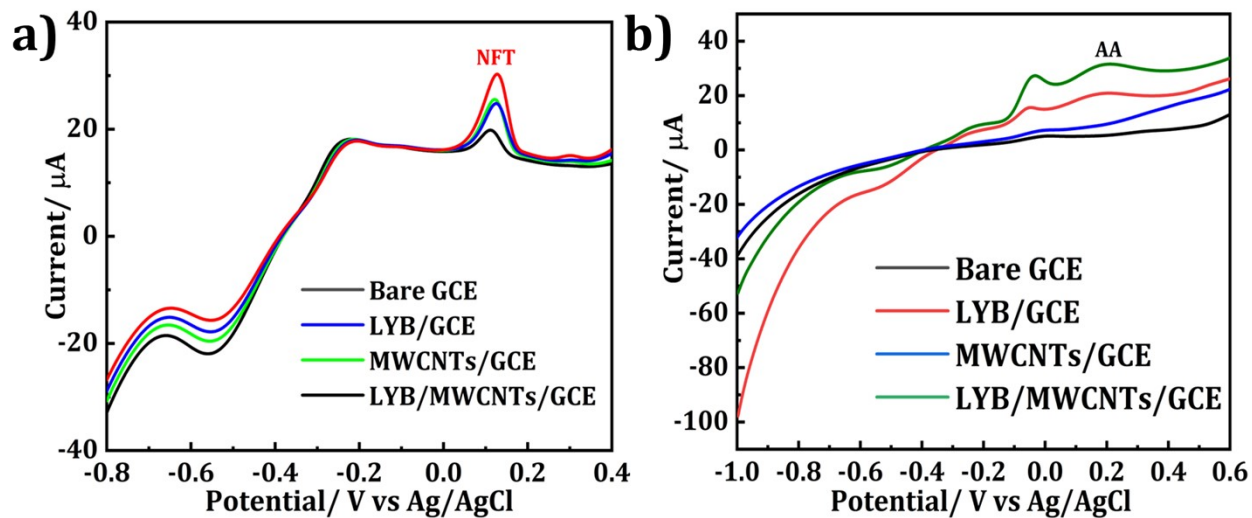

**Fig. S2.** (a) Individual LSV spectra of bare GCE, LYB/GCE, MWCNTs/GCE and LYB/MWCNTs/GCE in 50  $\mu\text{M}$  of NFT. (b) Individual LSV spectra of bare GCE, LYB/GCE, MWCNTs/GCE and LYB/MWCNTs/GCE in 50  $\mu\text{M}$  of AA with 0.1 M PBS (pH 6).

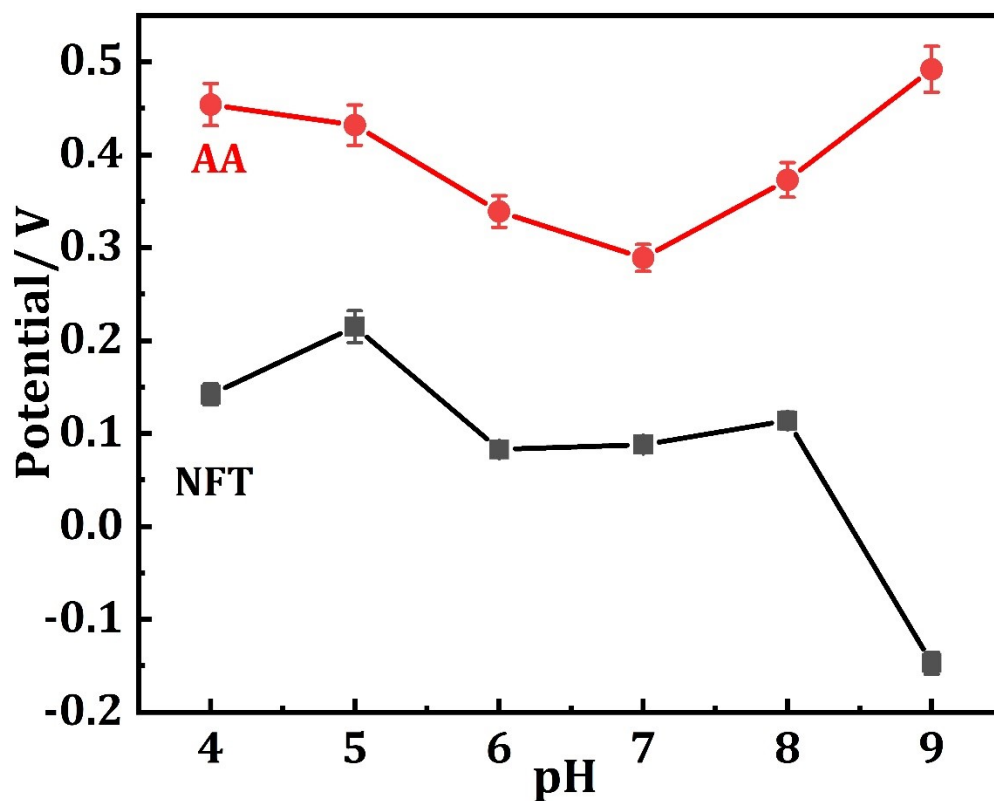

**Fig. S3.** The plot of various pH vs.  $E_{pa}$  of LYB/MWCNTs/GCE in the presence of AA and NFT.

**Table S1:** A comparison of the electrochemical oxidation of NFT using LYB/MWCNTs/GCE with other materials.

| Electrode material                                  | Method     | pH       | Linear range<br>(nM) | LOD<br>(nM)  | References              |
|-----------------------------------------------------|------------|----------|----------------------|--------------|-------------------------|
| N/Co@CNTs@CC                                        | LSV        | 7        | 50–550000            | 18.41        | 1                       |
| Pd-Ti <sub>3</sub> C <sub>2</sub> T <sub>x</sub> -P | DPV        | 8        | 30000–160000         | 0.01         | 2                       |
| AuNP-PPy-MXene                                      | LSV        | 7        | 6–172                | 0.26         | 3                       |
| Sr@Mn <sub>3</sub> O <sub>4</sub> /GO               | DPV        | 7        | 10–1443000           | 2.4          | 4                       |
| SmVO <sub>4</sub> -GNSs                             | i-t        | 7        | 35–672300            | 8.7          | 5                       |
| <b>LYB/MWCNTs/GCE</b>                               | <b>LSV</b> | <b>6</b> | <b>10–120</b>        | <b>10.94</b> | <b>Present<br/>Work</b> |

**Table S2:** A comparison of the electrochemical oxidation of AA using LYB/MWCNTs/GCE with other materials.

| Electrode material                 | Method     | pH       | Linear range<br>(nM) | LOD<br>(nM)  | References              |
|------------------------------------|------------|----------|----------------------|--------------|-------------------------|
| Pc <sub>2</sub> assembly electrode | i-t        | -        | 10000–200000         | 150          | 6                       |
| MWCNT/GONR                         | i-t        | 7        | 100–8500             | 60           | 7                       |
| RGO–ZnO                            | DPV        | 6        | 50000–2350000        | 3710         | 8                       |
| Au/RGO                             | CV         | 7        | 24000–1500000        | 51000        | 9                       |
| N-rGO                              | DPV        | 7        | 10000–4000000        | 9600         | 10                      |
| <b>LYB/MWCNTs/GCE</b>              | <b>LSV</b> | <b>6</b> | <b>10–120</b>        | <b>13.43</b> | <b>Present<br/>Work</b> |

## References

- 1 M. Li, T. Zhe, R. Li, F. Bai, P. Jia, Z. Xu, X. Wang, T. Bu, H. Wu and L. Wang, *Food Chem*, 2023, **418**, 135948.
- 2 S. H. Tumrani, R. R. Neiber, Z. Pitafi, I. A. Ahmed, R. A. Soomro, M. M. Ibrahim, S. Karakuş and Z. M. El-Bahy, *J Environ Chem Eng*, 2023, **11**, 111152.
- 3 A. T. Ezhil Vilian, S.-K. Hwang, G. Bhaskaran, M. Alhammadi, S. Kim, J. N. Tiwari, Y. Suk Huh and Y.-K. Han, *Chemical Engineering Journal*, 2023, **454**, 139980.
- 4 V. Vinothkumar, R. Sakthivel, S. M. Chen, A. Sangili and T. H. Kim, *Environ Sci Nano*, 2022, **10**, 503–518.
- 5 S. M. Babulal, C. Koventhan, S. M. Chen and W. Hung, *Compos B Eng*, 2022, **237**, 109847.
- 6 Y. Jiang, P. Liu, R. Gao, J. Bi, L. Gao and Y. Wang, *Langmuir*, 2023, **39**, 2080–2088.
- 7 C.-L. Sun, C.-T. Chang, H.-H. Lee, J. Zhou, J. Wang, T.-K. Sham and W.-F. Pong, *ACS Nano*, 2011, **5**, 7788–7795.
- 8 X. Zhang, Y.-C. Zhang and L.-X. Ma, *Sensors and Actuators B*, 2016, **227**, 488–496.

- 9 C. Wang, J. Du, H. Wang, F. Jiang, P. Yang and Y. Du, *Sensors and Actuators B*, 2014, **204**, 302–309.
- 10 H. Zhang and S. Liu, *J Alloys Compd*, 2020, **842**, 155873.
